# Supplementary material for: Muscle transcriptome analysis reveals molecular pathways and biomarkers involved in extreme ultimate pH and meat defect occurrence in chicken
Source: PubMed Central journal article supplement (PMC5526995; doi:10.1038/s41598-017-06511-6), 2017-07-25
Supplement: 41598_2017_6511_MOESM1_ESM.pdf [file 41598_2017_6511_MOESM1_ESM.pdf]

# **Muscle transcriptome analysis reveals molecular pathways and biomarkers involved in extreme ultimate pH and meat defect occurrence in chicken**

Stéphane Beauclercq<sup>1</sup>, Christelle Hennequet-Antier<sup>1</sup>, Christophe Praud<sup>1</sup>, Estelle Godet<sup>1</sup>, Anne Collin<sup>1</sup>, Sophie Tesseraud<sup>1</sup>, Sonia Métayer-Coustard<sup>1</sup>, Marie Bourin<sup>2</sup>, Marco Moroldo<sup>3</sup>, Frédéric Martins<sup>4,5</sup>, Sandrine Lagarrigue<sup>6</sup>, Elisabeth Le Bihan-Duval<sup>1</sup>, Cécile Berri<sup>\*,1</sup>

<sup>1</sup>URA, INRA, F-37380 Nouzilly, France

<sup>2</sup>ITAVI – Institut Technique de l’Aviculture, F-37380 Nouzilly, France

<sup>3</sup>GABI, AgroParisTech, INRA, Université Paris-Saclay, F-78350, Jouy-en-Josas, France

<sup>4</sup> Plateforme Genome et Transcriptome, Genopole de Toulouse, France

<sup>5</sup>INSERM, UMR1048, F-31432, Toulouse, France

<sup>6</sup>PEGASE, Agrocampus Ouest, INRA, F-35590, Saint-Gilles, France

\*Corresponding author: [cecile.berri@inra.fr](mailto:cecile.berri@inra.fr)

| Gene Symbol                 | Description                                                                    | Fold-change      | UniProtKB, GO functional annotation                                                                                                            |
|-----------------------------|--------------------------------------------------------------------------------|------------------|------------------------------------------------------------------------------------------------------------------------------------------------|
| <b>Down-regulated genes</b> |                                                                                | <b>pHu-/pHu+</b> |                                                                                                                                                |
| LSMEM1                      | leucine Rich Single-Pass Membrane Protein 1                                    | 0.21             |                                                                                                                                                |
| MTRF1                       | mitochondrial translational release factor 1                                   | 0.24             | Mitochondrial translation release factor activity                                                                                              |
| CRH                         | corticoliberin precursor                                                       | 0.28             | synaptic transmission, dopaminergic                                                                                                            |
| DOPEY1                      | dopey family member 1                                                          | 0.36             | golgi to endosome transport                                                                                                                    |
| RGCC                        | regulator of cell cycle                                                        | 0.38             | modulates the activity of cell cycle-specific kinases                                                                                          |
| MAPKAPK3                    | mitogen-activated protein kinase-activated protein kinase 3                    | 0.41             | activation of MAPK activity                                                                                                                    |
| ELFN1                       | extracellular leucine-rich repeat and fibronectin type III domain containing 1 | 0.42             | postsynaptic protein with protein phosphatase inhibitor activity                                                                               |
| SHISA2                      | protein shisa-2 homolog precursor                                              | 0.45             | role in the maturation of presomitic mesoderm cells                                                                                            |
| CHRNA3                      | acetylcholine receptor subunit gamma precursor                                 | 0.45             | muscle-type acetylcholine receptor                                                                                                             |
| CD79B                       | B-cell antigen receptor complex-associated protein beta chain precursor        | 0.46             | adaptive immune response                                                                                                                       |
| <b>Up-regulated genes</b>   |                                                                                | <b>pHu-/pHu+</b> |                                                                                                                                                |
| KIAA1731                    | centrosomal Protein 295                                                        | 3.92             | mediates centriole-to-centrosome conversion at late mitosis                                                                                    |
| SCARNA23                    | small Cajal body-specific RNA 23                                               | 3.34             |                                                                                                                                                |
| CA9                         | carbonic anhydrase 9                                                           | 3.12             | one-carbon metabolic process                                                                                                                   |
| SLC25A30                    | solute carrier family 25 member 30                                             | 2.58             | mitochondrial transport                                                                                                                        |
| FHL2                        | four and a half LIM domains 2                                                  | 2.57             | transcriptional regulation, focal adhesion                                                                                                     |
| PGPEP1L                     | pyroglutamyl-peptidase I-like                                                  | 2.41             | cysteine-type peptidase activity                                                                                                               |
| GADL1                       | glutamate decarboxylase like 1                                                 | 2.39             | may catalyze the decarboxylation of aspartate, cysteine sulfinic acid, and cysteic acid to beta-alanine, hypotaurine and taurine, respectively |
| FSTL4                       | follistatin-related protein 4 precursor                                        | 2.33             | negative regulation of collateral sprouting                                                                                                    |
| SLC34A2                     | Sodium-dependent phosphate transport protein 2B                                | 2.30             | sodium:phosphate symporter activity                                                                                                            |
| KY                          | kyphoscoliosis peptidase                                                       | 2.23             | probable cytoskeleton-associated protease required for normal muscle growth                                                                    |

**Supplementary Table S1. Top 10 up- and down-regulated genes between the pHu- and pHu+ (Only protein coding genes were included in this list)**

| Gene <sup>a</sup> | loading1 | loading2 | loading3 | loading4 | loading5 | loading6 | loading7 | loading8 | loading9 | loading10 | Freq. <sup>b</sup> |
|-------------------|----------|----------|----------|----------|----------|----------|----------|----------|----------|-----------|--------------------|
| ATP2B1.s2         | 0.123    | 0.235    | 0.248    | 0.193    | 0.135    | 0.208    | 0.151    | 0.258    | 0.111    | 0.176     | 1                  |
| LSMEM1.s2         | 0.525    | 0.400    | 0.377    | 0.393    | 0.349    | 0.425    | 0.406    | 0.372    | 0.382    | 0.412     | 1                  |
| CDAN1.s1          | -0.052   | -0.132   | -0.118   | -0.208   | -0.061   | -0.066   | -0.077   | -0.168   | -0.040   | -0.075    | 1                  |
| LOC100859584      | 0.115    | 0.206    | 0.075    | 0.148    | 0.162    | 0.124    | 0.120    | 0.154    | 0.255    | 0.133     | 1                  |
| LOC107052650      | 0.496    | 0.482    | 0.486    | 0.473    | 0.437    | 0.474    | 0.481    | 0.446    | 0.468    | 0.485     | 1                  |
| ID3.s1            | 0.164    | 0.089    | 0.137    | 0.072    | 0.036    | 0.093    | 0.075    | 0.192    | 0.070    | 0.080     | 1                  |
| MORN4.s1          | 0.113    | 0.162    | 0.112    | 0.218    | 0.218    | 0.175    | 0.133    | 0.165    | 0.216    | 0.219     | 1                  |
| MYLIP.s1          | -0.068   | -0.102   | -0.037   | -0.038   | -0.136   | -0.092   | -0.037   | -0.028   | -0.048   | -0.067    | 1                  |
| PCGF5.s1          | 0.036    | 0.093    | 0.073    | 0.096    | 0.190    | 0.067    | 0.060    | 0.083    | 0.170    | 0.097     | 1                  |
| PPFIBP1.s1        | 0.073    | 0.216    | 0.071    | 0.124    | 0.010    | 0.176    | 0.116    | 0.134    | 0.116    | 0.106     | 1                  |
| PRKCH.s1          | -0.158   | -0.188   | -0.218   | -0.183   | -0.133   | -0.184   | -0.220   | -0.213   | -0.271   | -0.241    | 1                  |
| SLC34A2           | -0.079   | -0.101   | -0.124   | -0.122   | -0.129   | -0.110   | -0.112   | -0.113   | -0.025   | -0.125    | 1                  |
| THSD7B.s2         | -0.108   | -0.111   | -0.173   | -0.113   | -0.087   | -0.105   | -0.083   | -0.116   | -0.237   | -0.168    | 1                  |
| TNS1.s2           | 0.026    | 0.089    | 0.176    | 0.111    | 0.073    | 0.065    | 0.043    | 0.065    | 0.072    | 0.058     | 1                  |
| CA9               | -0.026   | -0.025   | -0.043   | -0.049   | NA       | -0.056   | -0.130   | -0.024   | -0.100   | -0.011    | 0.9                |
| CR353278          | 0.048    | 0.113    | NA       | 0.079    | 0.181    | 0.057    | 0.099    | 0.119    | 0.013    | 0.155     | 0.9                |
| DYNC1H1.s1        | 0.129    | 0.115    | 0.045    | 0.195    | NA       | 0.130    | 0.153    | 0.277    | 0.123    | 0.137     | 0.9                |
| ENC1.s2           | -0.060   | -0.147   | -0.049   | -0.085   | -0.049   | -0.072   | -0.005   | -0.012   | NA       | -0.070    | 0.9                |
| GYLTL1B.s3        | 0.098    | 0.131    | NA       | 0.089    | 0.231    | 0.099    | 0.032    | 0.095    | 0.057    | 0.099     | 0.9                |
| HLF.s2            | 0.072    | 0.058    | 0.069    | 0.155    | 0.111    | 0.078    | 0.037    | 0.002    | NA       | 0.136     | 0.9                |
| PLEKHC1.s1        | 0.005    | 0.091    | NA       | 0.061    | 0.055    | 0.097    | 0.130    | 0.077    | 0.092    | 0.018     | 0.9                |
| LOC107049762      | -0.182   | -0.058   | NA       | -0.103   | -0.057   | -0.044   | -0.004   | -0.005   | -0.030   | -0.125    | 0.9                |
| COG5.s2           | 0.039    | 0.079    | 0.025    | 0.040    | 0.022    | 0.339    | 0.020    | 0.095    | NA       | NA        | 0.8                |
| CR338879          | -0.067   | -0.123   | NA       | -0.062   | -0.057   | -0.013   | -0.033   | -0.072   | NA       | -0.041    | 0.8                |
| LOC768393         | -0.026   | -0.069   | NA       | -0.064   | -0.055   | -0.062   | NA       | -0.016   | -0.017   | -0.018    | 0.8                |
| RHOC.s1           | 0.158    | 0.178    | NA       | 0.182    | 0.131    | NA       | 0.141    | 0.202    | 0.231    | 0.195     | 0.8                |
| SLC7A5.s2         | -0.033   | -0.048   | -0.170   | -0.090   | NA       | -0.058   | -0.024   | -0.087   | NA       | -0.053    | 0.8                |
| HECTD2.s1         | NA       | 0.038    | 0.015    | 0.019    | NA       | 0.025    | 0.007    | 0.113    | 0.076    | 0.046     | 0.8                |
| ANKRD1.s2         | 0.060    | 0.028    | NA       | 0.085    | 0.001    | NA       | NA       | 0.009    | NA       | 0.009     | 0.6                |
| VTI1B.s1          | -0.262   | -0.318   | -0.323   | NA       | NA       | -0.297   | -0.317   | NA       | NA       | -0.289    | 0.6                |
| AMPD3.s1          | NA       | 0.005    | NA       | 0.092    | NA       | 0.022    | 0.060    | 0.100    | NA       | 0.067     | 0.6                |
| BICD2.s2          | NA       | -0.032   | -0.016   | -0.052   | NA       | -0.008   | -0.071   | NA       | NA       | -0.034    | 0.6                |
| RAI14.s2          | NA       | 0.089    | NA       | 0.012    | NA       | 0.120    | 0.162    | 0.002    | NA       | 0.021     | 0.6                |
| MEF2C.s2          | -0.095   | -0.151   | NA       | -0.173   | NA       | -0.095   | -0.073   | NA       | NA       | NA        | 0.5                |
| SEPT-09.s1        | NA       | 0.060    | NA       | 0.055    | NA       | NA       | 0.069    | 0.042    | 0.033    | NA        | 0.5                |
| CR406450          | NA       | NA       | NA       | 0.012    | 0.125    | 0.029    | NA       | NA       | 0.104    | 0.095     | 0.5                |
| CR386528          | 0.005    | NA       | NA       | 0.011    | 0.218    | NA       | NA       | 0.058    | NA       | NA        | 0.4                |
| ZC2HC1A.s1        | NA       | 0.066    | NA       | NA       | NA       | 0.022    | NA       | 0.021    | NA       | 0.022     | 0.4                |
| PFN2.s1           | NA       | NA       | 0.001    | NA       | NA       | NA       | NA       | 0.075    | 0.166    | 0.116     | 0.4                |
| CYB5R3.s1         | NA       | NA       | NA       | 0.036    | NA       | 0.008    | NA       | NA       | 0.166    | 0.135     | 0.4                |

**Supplementary table S2. Loadings of the 1<sup>st</sup> component of fsPLS models.** The loading of genes or representative probes in the 10 fsPLS models performed at each CV step are tabled. The stability of gene selection in the models is indicated in Freq. column.

<sup>a</sup>The number following ‘.s’ correspond to the reference of the representative probe. This information was used to target the primer design for quantitative RT-PCR validation. The genes highlighted in orange were part of the validation gene set.

<sup>b</sup>A cutoff was set at 40% for the stability of gene selection.

| <b>Gene</b> | <b>comp1</b> | <b>comp2</b> | <b>comp3</b> |
|-------------|--------------|--------------|--------------|
| PRKCH       | -0.2099      | -0.3860      | 0.2314       |
| THSD7B      | -0.1975      | -0.4033      | 0.3664       |
| CA9         | -0.1470      | -0.5411      | 0.1925       |
| ENC1        | -0.1194      | -0.3173      | 0.0408       |
| SLC25A30    | -0.1105      | -0.3000      | 0.5930       |
| VTI1B       | -0.0207      | -0.5964      | 0.1878       |
| CAV3        | 0.2018       | -0.2645      | 0.2758       |
| PPFIBP1     | 0.2144       | -0.1305      | 0.2101       |
| SHISA2      | 0.2218       | -0.0468      | -0.2178      |
| AMPD3       | 0.2231       | -0.0657      | 0.2627       |
| SLC2A1      | 0.2340       | -0.1106      | 0.2219       |
| PRKAB1      | 0.2435       | -0.2423      | -0.0476      |
| ANKRD1      | 0.2451       | -0.0966      | 0.0976       |
| CR387500    | 0.2611       | -0.1245      | 0.4526       |
| MORN4       | 0.2787       | -0.3347      | -0.0310      |
| RGCC        | 0.2792       | -0.1500      | -0.2529      |
| MAPKAPK3    | 0.2907       | -0.1237      | -0.1367      |
| PLEKHC1     | 0.2931       | -0.2861      | 0.1777       |
| PCGF5       | 0.2932       | -0.0550      | 0.1186       |
| RHOC        | 0.3189       | -0.2368      | -0.1188      |

**Supplementary table S3. Loadings of the 3 components of the 20 genes kept in the final PLS model fitted on gene expression measured using microfluidic technology from the population of 278 chickens.**

# Transcriptomics

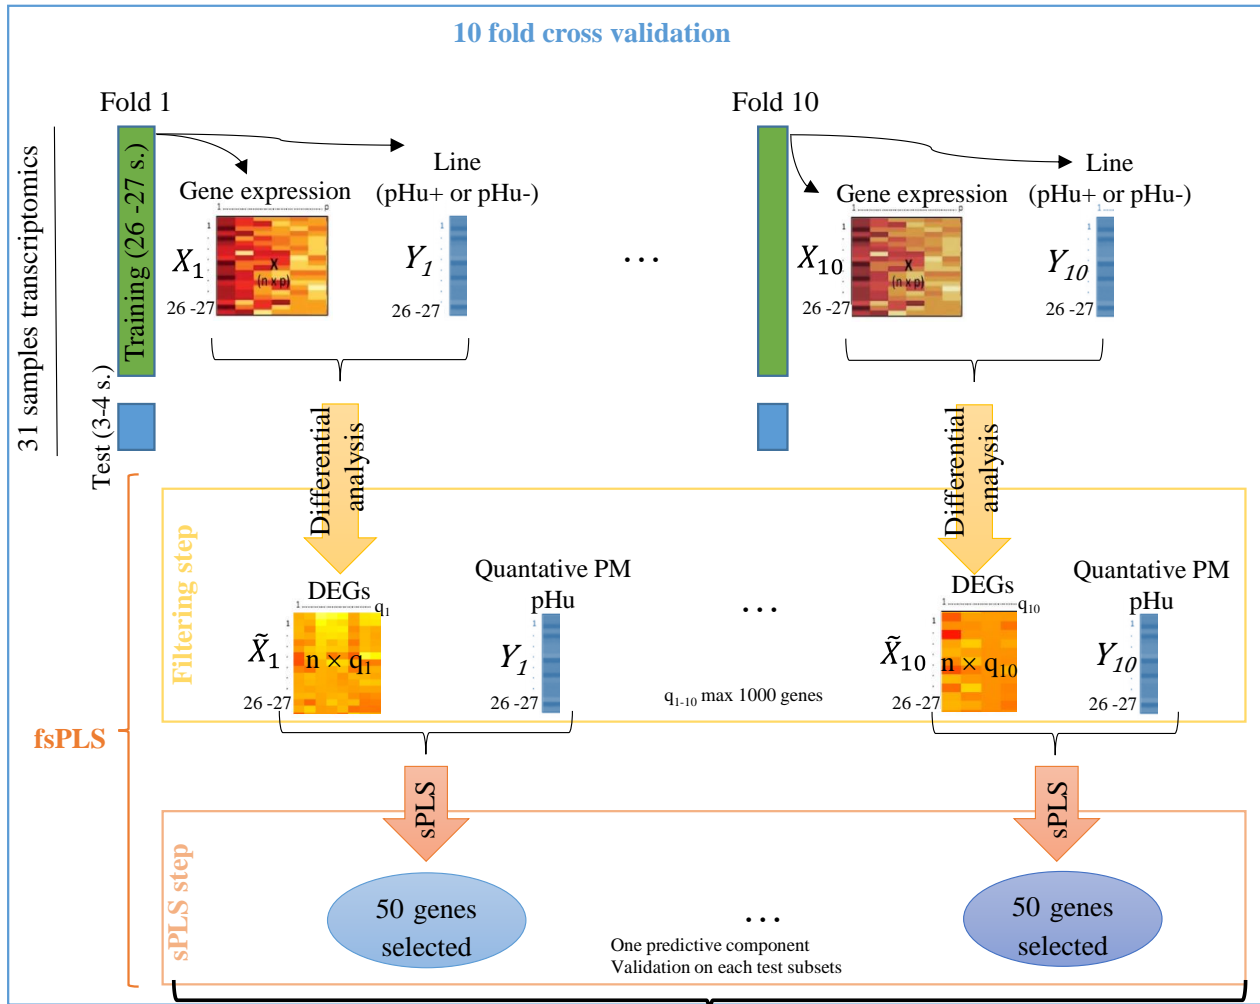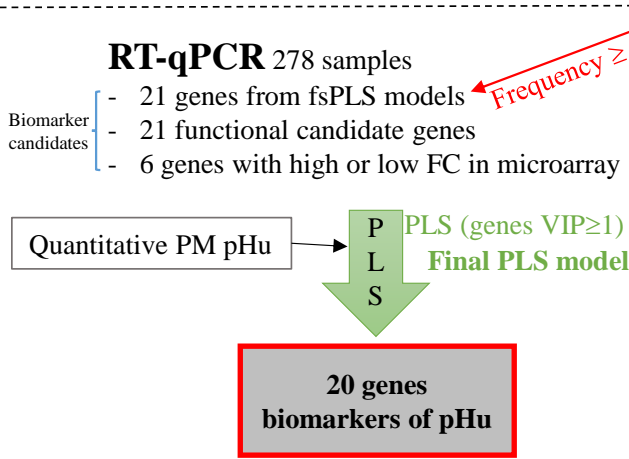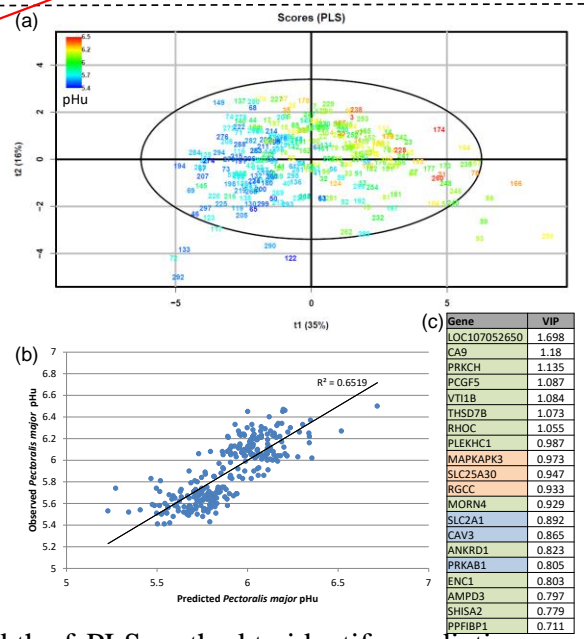

**Supplementary figure S1.** The first part of the figure described the fsPLS method to identify predictive biomarkers. The validation of the PLS model with 20 genes on a population of 278 chickens was explained in the second part of the figure.

| Gene         | ID                 | Supplementary info                          | Primer sequence (forward /reverse)                    |
|--------------|--------------------|---------------------------------------------|-------------------------------------------------------|
| AMPD3        | ENSGALT0000009084  | fsPLS                                       | CCCAAGAACGACATCCCAGTA / AACAAACGGAATGCCACCTT          |
| ANKRD1       | ENSGALT00000010491 | fsPLS                                       | GCACAATCATCTGGACACTGG / CACTGAACTGCTGCTCGGTTA         |
| ATP2B1       | ENSGALT00000018372 | fsPLS                                       | TGGCCTCTGTCTGATTAGTT / CCATTTTGCCCGAGATAACAGAA        |
| CA9          | ENSGALT00000034416 | fsPLS                                       | GACACACCAGCTCATTTTCAT / TGTGTAGATGACCTTGGATTG         |
| CDAN1        | ENSGALT00000014915 | fsPLS                                       | TGACTGGCTCGTCTCTGAAC / TTGAAATTGAGCTCACAGTGAAAAA      |
| COG5         | ENSGALT00000039462 | fsPLS                                       | CCACAGCTCTACTTCAGGTTAAT / TTCTAATAGCACGTAACAAGGGT     |
| DYNC1H1      | ENSGALT00000037512 | fsPLS                                       | TGAAGTGCTTGCCAATAAGATAGT / TCTTTATCTTCTGAATCCTCTCCCT  |
| ENC1         | ENSGALT00000024082 | fsPLS                                       | ATCGGCTATCAACTGGGTCA / TGTAGGATCTTTAACTTGCATCGT       |
| HLF          | ENSGALT00000004832 | fsPLS                                       | CTCCCAGGCTCAGTTCAGTT / TAGCAGAGGTCGGTGAATTGT          |
| ID3          | ENSGALT00000044128 | fsPLS                                       | GGGCTCCAATACTCAGACGA / AAAGAAAGCCGGGATTTGGG           |
| LOC107052650 | XR_001465270       | fsPLS                                       | AGCAGAATAAGCAGCGGAGG / AACAGAGACACTAACAGAGAAAGGG      |
| LSMEM1       | ENSGALT00000030698 | fsPLS                                       | TGAAATTCAGCATCACTCTATTCA / TCACATCAAAACAGAATCAAATATCC |
| MORN4        | ENSGALT00000009932 | fsPLS                                       | CAAAGCGGACGTGTGTATG / AGCAGACTTGAGGCAATCT             |
| MYLIP        | ENSGALT00000020742 | fsPLS                                       | GAAGTTTATGACCATGCAAGAAGAG / TTGTGTCAGCTAAGACCC        |
| PCGF5        | ENSGALT00000010507 | fsPLS                                       | ATCTGCCTCGACTGTTTACG / ATTGCATAGTACATCCAGCTCAT        |
| PLEKHC1      | ENSGALT00000020309 | fsPLS                                       | TTCCGACATCTGCAAAACCTTC / TGACGGGGCCGATGTAAAGAAT       |
| PPFIBP1      | ENSGALT00000022836 | fsPLS                                       | TTGCTCGTTTCATCACTGCC / ACATCTCTGGTCTACCCCCAAC         |
| PRKCH        | ENSGALT00000019399 | fsPLS                                       | GCTGTATGGCCCTGATGTTG / TGAACGCTTTGAGGATTGCC           |
| RHOC         | ENSGALT00000002385 | fsPLS                                       | GGTCTACGTGCCAACTGTGT / CAGGGATGTTCTCGAGGCTG           |
| THSD7B       | ENSGALT00000020191 | fsPLS                                       | AGTAGCGAGTTGGAATGGCTGA / AGCGCCCATCTATCTCTCAA         |
| VTI1B        | ENSGALT00000015509 | fsPLS                                       | AGCAGATTGGTGAATACAAGTGA / ACAAGTCACAAAGGCTCATCT       |
| GADL1        | ENSGALT00000018667 | High LFC                                    | AGGAGAGAGTGAACAGAGCG / TGCCAAAATTCAGGTCCATCC          |
| MAPKAPK3     | ENSGALT00000003585 | High LFC                                    | ACTCGAACACTGGACAAGCT / GTCATCTCTCTGTTGGGTCA           |
| RGCC         | ENSGALT00000027403 | High LFC                                    | CCATCAGTAACTCCTTGTAAGC / AACAAAAGTTATCAGACAAAAGGCA    |
| RHOBTB3      | ENSGALT00000023647 | High LFC                                    | TGAGCAGGTTTCAGAGGGTT / GGTCTTAGTGCTAGGTTGGGA          |
| SHISA2       | ENSGALT00000043654 | High LFC                                    | TTTACAACGGAAGGAAAAGCGA / TTAATCAGAGCGCCCTTTCAG        |
| SLC25A30     | ENSGALT00000027432 | High LFC                                    | GGCATTCTTTCGGGAGTCATT / CTGTGCTGTCAGGGAAACTC          |
| AGL          | ENSGALT00000008683 | Metabolism / glycogenolysis                 | TTTGATCGCCACAAGTTCAG / ACTATGTAACCTCCACCCTTT          |
| ALDH7A1      | ENSGALT00000013392 | Metabolism / Biosynthesis of amino acids    | AGATTGGTGGTGTCTTTGGT / CCTGGCACAGTCACTCATAA           |
| AMPD1        | ENSGALT00000003247 | Metabolism / Purine metabolism              | CTTTGTTCTGTGTTTGAGGCA / CTGCTCTGGCTTTGGACTTTTT        |
| CAPN2        | ENSGALT00000015245 | Metabolism / Protease                       | ACATCATCGTGCCCTCTACC / GAGATCTCTGCATCGCTCC            |
| CAPN3        | ENSGALT00000032636 | Metabolism / Protease                       | CAAACCAGTGCTCATTCCCT / GCCTGACCCACACTGATTTT           |
| CAV3         | ENSGALT00000013599 | Metabolism / Endocytosis                    | GAAAGGCAGCTACACCACCT / GTAGATGCGGCTGACACACT           |
| ENO3         | NM_205119          | Metabolism / Glucose metabolism             | CTGTGCACCGGCAGATTA / GCTGCCCTTATTTGGCTTTG             |
| HIBADH       | ENSGALT00000018085 | Metabolism / Metabolism of amino acids      | CTTTCATGGTTGGTGAATGGA / TTTTGGCCAGCAGCTTTGG           |
| LDHA         | ENSGALT00000039415 | Metabolism / Glycolysis and gluconeogenesis | TTAACTTGGTCCAACGCAACGTCAAT / TCCACTGGGTTTGAGACAATCAG  |
| PDE3B        | ENSGALT00000039611 | Metabolism / Insulin signalling pathway     | CACCATCTCAGCGAAAATCACA / TCTCTAGCTGCCGCTCATCTT        |
| PFKFB4       | ENSGALT00000003276 | Metabolism / Glucose metabolism             | GGCAGGAGAACGTCTTGGTT / AGATGGACTCCACTTCGCAC           |
| PGAM1        | ENSGALT00000039466 | Metabolism / Glucose metabolism             | AGGGCAAGAGAGTCCTTATCG / ATGGGCTTCAGGTTCTTGTC          |
| PHKB         | ENSGALT00000042911 | Metabolism / Glycogen Metabolism            | GCTTAACCGACGACAAATAGATGG / CGTCATATCCGATAAGGTTGGTTG   |

|               |                    |                                           |                                                    |
|---------------|--------------------|-------------------------------------------|----------------------------------------------------|
| PPP1R3A       | ENSGALT00000038901 | Metabolism / Glycogen Metabolism          | GGCAAACAACGACGACAAAAAC / TTCTTCCTTGCTGCTTGGTGC     |
| <b>PRKAB1</b> | ENSGALT00000011925 | Metabolism / Glycogen Metabolism          | TAAACCCCCACTCAAGCTCGACC / CCACTGCCCATCCACAAAGAAC   |
| PRKAB2        | ENSGALT00000002567 | Metabolism / Glycogen Metabolism          | CACGTCATGCTCAATCACCTCTAC / CAGACAAAGTGGTGTTCGTGTCC |
| PRKAG3        | ENSGALT00000038233 | Metabolism / Glycogen Metabolism          | CCGACAACAATTTCCAGAGCC / TCTGCATCTTGCTGTCCACAG      |
| <b>SLC2A1</b> | ENSGALT00000007808 | Metabolism / Glucose transport            | ACAACACCGGCGTCATCAA / TTGACATCAGCATGGAGTTACG       |
| SLC2A12       | ENSGALT00000022653 | Metabolism / Glucose transport            | AGAGAGTGGGGAGGTTCCC / TCAGGACGAGCCAAGACA           |
| <b>SLC2A3</b> | ENSGALT00000037225 | Metabolism / Glucose transport            | TGCTCATCTTCTTCATATTCACAT / ACTTCTTTGTCAGGTTCTATGC  |
| SOD1          | ENSGALT00000036785 | Metabolism / Cellular responses to stress | GATTCTGTCAATTTCTCTTACCG / CTCATTTCCCACTGCCATCT     |
| CDK6          | ENSGALT00000015428 | Reference                                 | TCCAGACCCGCACAACCTATT / TCACCTCACTGGAGTTTTGGC      |

**Supplementary table S4. Primer sequences for the 49 genes analysed by RT-qPCR on male and female population of 278 chickens issued from the pHu lines.** The genes highlighted in bold were differentially expressed between pHu+ and pHu- lines using F-test in analysis of variance (p-value  $\leq 0.05$ ).

The supplementary information column mention the reason of the selection of genes for validation: the gene issued of the fsPLS model are highlighted in green, those with extreme fold-change based on microarray analysis in orange, and those whose function is directly related to carbohydrate and muscle metabolism in blue.
